# Supplementary material
Source: Springer Nature journal article supplement (https://www.springermedizin.de/resource/supplementary/12936_2011_1772_MOESM2_ESM.pdf/9541700)

## *An. gambiae* s.s.

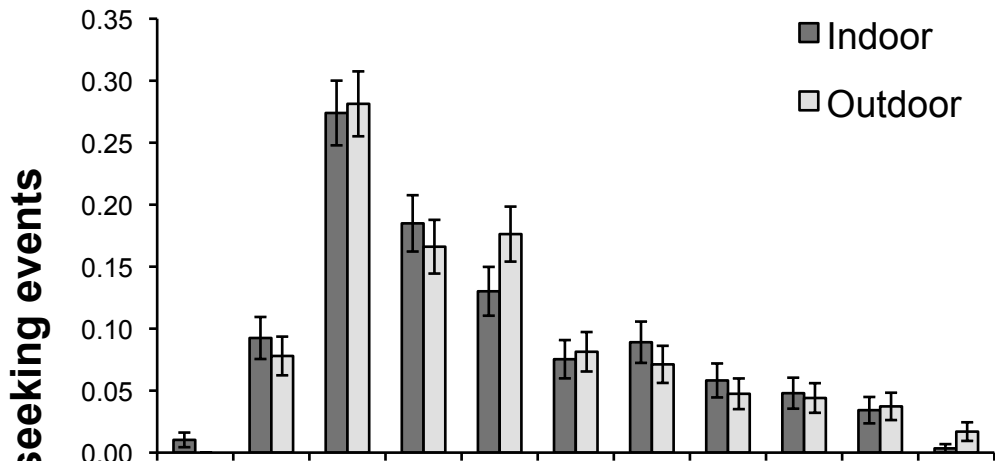

## *An. melas*

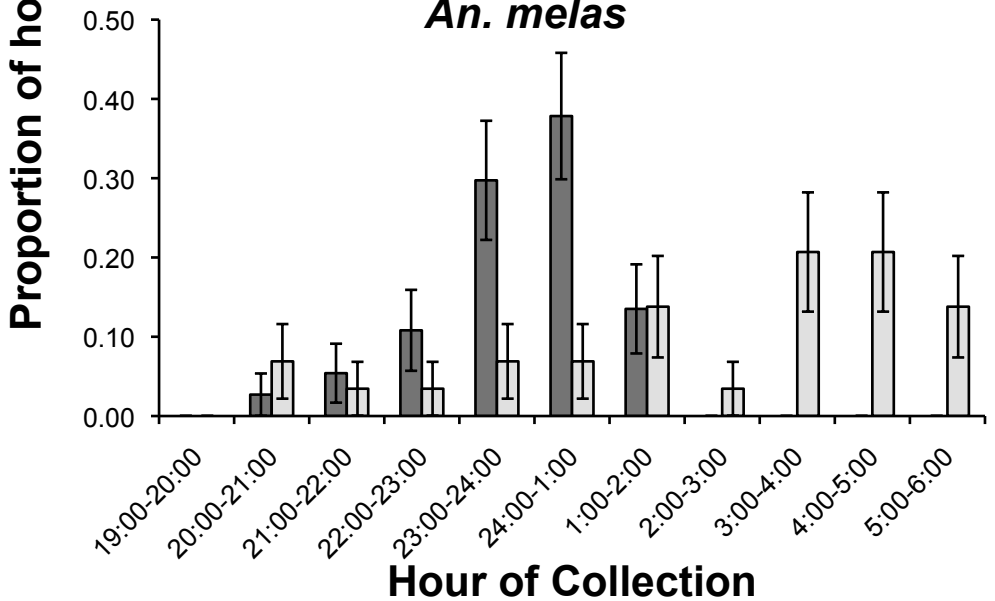

Supplement: MOESM2 [file 9541700]
